# Supplementary material
Source: PubMed Central journal article supplement (PMC4115570)
Supplement: 1321785111_pnas.201321785SI.pdf [file 1321785111_pnas.201321785SI.pdf]

# Supporting Information

Sacino et al. 10.1073/pnas.1321785111

## SI Materials and Methods

**Expression and Purification of Recombinant  $\alpha$ S Proteins.** Recombinant N-terminal truncated 21–140 human  $\alpha$ -synuclein ( $\alpha$ S) (with a Met codon added before amino acid 21), 71–82 deletion ( $\Delta$ 71–82) human  $\alpha$ S, and full-length mouse  $\alpha$ S were expressed and purified to homogeneity as previously described (1–3). The 21–140 human  $\alpha$ S was shown to induce  $\alpha$ S inclusion formation similar to full-length protein in cultured cells (4, 5) but provided the added advantage of being able to determine that inclusions are comprised of the endogenously expressed  $\alpha$ S using N-terminal  $\alpha$ S antibodies (6, 7). The  $\Delta$ 71–82  $\alpha$ S has a deletion in the middle of the hydrophobic region of  $\alpha$ S that is required for amyloid formation and therefore lacks the ability to form or seed  $\alpha$ S amyloid in vitro and in vivo under physiological conditions (1, 2, 4, 8).

**Fibril Preparation of Recombinant  $\alpha$ S for Injection.**  $\alpha$ S protein was assembled into filaments by incubation at 37 °C at 5 mg/mL in sterile PBS (Invitrogen) with continuous shaking at 1,050 rpm (Thermomixer R; Eppendorf) for 48 h.  $\alpha$ S amyloid fibril assembly was monitored as previously described with K114 fluorometry (2, 9).  $\alpha$ S fibrils were diluted in sterile PBS and treated by mild water bath sonication for 2 h at room temperature. These fibrils were tested for induction of intracellular amyloid inclusion formation as previously described (5). The  $\Delta$ 71–82  $\alpha$ S used for the current studies was not preincubated and is in the soluble form as previously described (1, 2). We have also recently shown that this same preparation of  $\Delta$ 71–82  $\alpha$ S cannot directly seed the formation of  $\alpha$ S inclusions in primary neuronal culture. In contrast, the same preparation of fibrillar  $\alpha$ S can seed inclusion formation very efficiently in those cultures (8).

**Immunohistochemical Analysis.** Mice were killed with CO<sub>2</sub> euthanasia and perfused with PBS/heparin. The brain and spinal cord were then removed and fixed for at least 48 h in 70% ethanol/150 mM NaCl or neutral buffered formalin followed by paraffin infiltration. Paraffin-embedded tissue blocks were cut in 7- $\mu$ m sections that were immunostained using previously described methods and immunocomplex visualization via chromogen 3,3'-diaminobenzidine (10). Sections also were counterstained with hematoxylin. All slides were scanned using an Aperio ScanScope CS (40 $\times$  magnification; Aperio Technologies), and images of representative areas were taken using the ImageScope software (40 $\times$  magnification; Aperio Technologies). Quantification of immunoreactivity for the levels of astrogliosis and microgliosis was accomplished using ImageScope software to measure the density of staining per area. Three independent regions were quantified per animal, and two animals were used per condition. The data are expressed as averaged immunoreactivity per area normalized to the control  $\pm$  SEM. Stained tissue sections from untreated young (3 mo to 4 mo) M83 transgenic (Tg) mice without  $\alpha$ S inclusion pathology were used as the baseline control.

**Muscle Histology.** Whole-mount flexor digitorum brevis muscles were placed into ice-cold PBS for less than 10 min to remove connective tissue and gently spread the muscle bundles using sharp forceps. Tissues were fixed with 4% paraformaldehyde in PBS for 20 min at room temperature, rinsed, and processed for immunostaining as described (11). Whole mounts were incubated in blocking buffer (PBS with 1% Triton X-100, 5% normal goat serum, and 1% BSA) overnight at 4 °C and then incubated in chicken anti-neurofilament-H (1:3,000; Encore Biotechnology) and mouse monoclonal anti-syntaptotagmin (1:1,000; Devel-

opmental Studies Hybridoma Bank) antibodies in diluting buffer for 24 h at 4 °C. Whole mounts were washed in PBS for 3 h, followed by incubation in Alexa-488 goat anti-chicken and Alexa-488 goat anti-mouse secondary antibodies and Alexa-594  $\alpha$ -bungarotoxin (all from Invitrogen) overnight at 4 °C. After washing for 3 h in PBS, samples were mounted on slides in ProLong Antifade mounting media (Invitrogen). Quantification of the neuromuscular junction (NMJ) integrity was assessed as a ratio of the number of innervated NMJs (seen by full colocalization of presynaptic axonal and postsynaptic acetylcholine receptor markers) (Fig. S6A) divided by the total number of postsynaptic receptor sites per field (Fig. S6B) in  $\alpha$ S intramuscular (IM)-injected M83<sup>+/-</sup> Tg mice ( $n = 10$ ) and age-matched, naive M83<sup>+/-</sup> Tg mice ( $n = 10$ ).

**Motor Neuron Counting.** The entire lumbar region of each mouse spinal cord was paraffin-embedded and consecutive-sectioned (7  $\mu$ m). These sections were deparaffinized and hydrated through a series of graded ethanol solutions. The sections were incubated in 0.1% Luxol fast blue solution at 56 °C overnight. After rinsing in distilled water, sections are differentiated in 0.05% lithium carbonate and 70% (vol/vol) ethanol. Sections were counterstained with cresyl violet solution for 6 min before differentiation in 95% (vol/vol) ethanol and dehydration. The number of motor neurons from every tenth section of the lumbar cord was then counted from phenotypic IM-injected M83 Tg mice ( $n = 6$ ) and from native nontransgenic (nTg) mice ( $n = 4$ ). The data were then expressed as a ratio of the average number of motor neurons in the lumbar spine of M83 Tg mice to nTg mice. This comparison was used because it has been previously shown that aged, symptomatic (paralyzed) M83 Tg mice show no loss of motor neuron counts compared with nTg mice (10).

**Double-Labeling Immunofluorescence Analysis of Mouse Brain Tissue.** Paraffin-embedded tissue sections were deparaffinized and hydrated through a series of graded ethanol solutions followed by 0.1 M Tris (pH 7.6). The sections were blocked with 5% dry milk/0.1 M Tris (pH 7.6) and were incubated simultaneously with combinations of primary antibodies diluted in 5% dry milk/0.1 M Tris (pH 7.6). After extensive washing, sections were incubated with secondary antibodies conjugated to Alexa 594 or Alexa 488 (Invitrogen). Sections were postfixed with formalin, incubated with Sudan Black, and stained with 5  $\mu$ g/mL 4',6-diamidino-2-phenylindole (DAPI). The sections were cover-slipped with Fluoromount-G (SouthernBiotech) and visualized using an Olympus BX51 microscope mounted with a DP71 Olympus digital camera to capture images.

**Antibodies.** pSer129/81A is a mouse monoclonal antibody that recognized  $\alpha$ S phosphorylated at Ser129 (12). SNL-4 is a rabbit polyclonal antibody raised against a synthetic peptide corresponding to amino acids 2–12 of  $\alpha$ S (6). Syn506 is an anti-N-terminal  $\alpha$ S antibody that preferentially detects  $\alpha$ S in pathological inclusions (7). Anti-p62 (SQSTM1; Proteintech), anti-glial fibrillary acidic protein (GFAP) (Promega), and anti-ionized calcium-binding adaptor molecule 1 (Iba-1) (DAKO) are rabbit polyclonal antibodies. Anti-choline acetyltransferase (CHAT) (Millipore) is a goat polyclonal antibody. Chicken polyclonal anti-neurofilament-H antibody was obtained from Encore Biotechnology and a mouse monoclonal anti-syntaptotagmin antibody was from the Developmental Studies Hybridoma Bank.

- Giasson BI, Murray IV, Trojanowski JQ, Lee VMY (2001) A hydrophobic stretch of 12 amino acid residues in the middle of alpha-synuclein is essential for filament assembly. *J Biol Chem* 276(4):2380–2386.
- Waxman EA, Mazzulli JR, Giasson BI (2009) Characterization of hydrophobic residue requirements for alpha-synuclein fibrillization. *Biochemistry* 48(40):9427–9436.
- Greenbaum EA, et al. (2005) The E46K mutation in alpha-synuclein increases amyloid fibril formation. *J Biol Chem* 280(9):7800–7807.
- Luk KC, et al. (2009) Exogenous alpha-synuclein fibrils seed the formation of Lewy body-like intracellular inclusions in cultured cells. *Proc Natl Acad Sci USA* 106(47):20051–20056.
- Waxman EA, Giasson BI (2010) A novel, high-efficiency cellular model of fibrillar alpha-synuclein inclusions and the examination of mutations that inhibit amyloid formation. *J Neurochem* 113(2):374–388.
- Giasson BI, et al. (2000) A panel of epitope-specific antibodies detects protein domains distributed throughout human alpha-synuclein in Lewy bodies of Parkinson's disease. *J Neurosci Res* 59(4):528–533.
- Waxman EA, Duda JE, Giasson BI (2008) Characterization of antibodies that selectively detect alpha-synuclein in pathological inclusions. *Acta Neuropathol* 116(1):37–46.
- Sacino AN, et al. (2013) Conformational templating of  $\alpha$ -synuclein aggregates in neuronal-glia cultures. *Mol Neurodegener* 8:17.
- Crystal AS, et al. (2003) A comparison of amyloid fibrillogenesis using the novel fluorescent compound K114. *J Neurochem* 86(6):1359–1368.
- Giasson BI, et al. (2002) Neuronal alpha-synucleinopathy with severe movement disorder in mice expressing A53T human alpha-synuclein. *Neuron* 34(4):521–533.
- Valdez G, et al. (2010) Attenuation of age-related changes in mouse neuromuscular synapses by caloric restriction and exercise. *Proc Natl Acad Sci USA* 107(33):14863–14868.
- Waxman EA, Giasson BI (2008) Specificity and regulation of casein kinase-mediated phosphorylation of alpha-synuclein. *J Neuropathol Exp Neurol* 67(5):402–416.

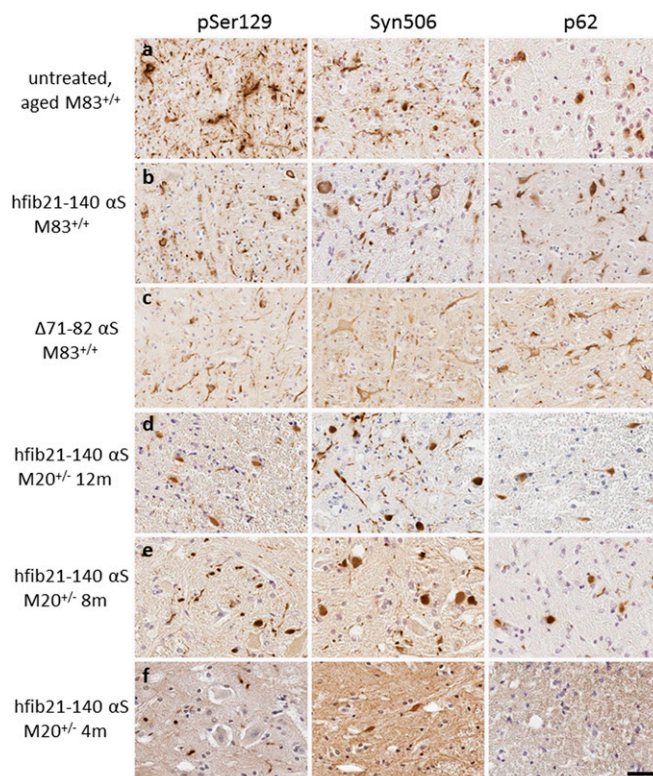

**Fig. S1.**  $\alpha$ S pathology in injected M83<sup>+/+</sup> and M20<sup>+/-</sup> Tg mice is detectable with multiple markers for mature  $\alpha$ S pathology. Representative images of brainstem tissue sections from a 15-mo-old, untreated M83<sup>+/+</sup> Tg mouse that developed motor impairments (A), an M83<sup>+/+</sup> Tg mouse that is 2 mo post-IM (biceps femoris muscle) injection with hfib21-140  $\alpha$ S (B), and an M83<sup>+/+</sup> Tg mouse that is 4 mo postinjection (biceps femoris muscle) with  $\Delta$ 71–82  $\alpha$ S (C); and cervical spinal cord tissue sections from M20<sup>+/-</sup> Tg mice that are 12 mo (D), 8 mo (E), and 4 mo (F) postinjection (biceps femoris muscle) hfib21-140  $\alpha$ S. Sections were stained with three separate markers for mature  $\alpha$ S pathology: pSer129/81A, an antibody detecting  $\alpha$ S inclusions that are hyperphosphorylated at Ser129 (1, 2); Syn506, an antibody that specially recognized the N terminus of  $\alpha$ S (3); and p62, an antibody that nonspecifically recognizes intracellular protein aggregates (4). Each marker was able to detect  $\alpha$ S pathology with similar staining densities in untreated and injected M83 Tg<sup>+/+</sup> mice, and 8 mo- and 12 mo-injected M20 Tg mice. In M20<sup>+/-</sup> Tg mice 4 mo after injection, inclusions were not stained with p62 antibodies. (Scale bar: 50  $\mu$ m.)

- Waxman EA, Giasson BI (2010) A novel, high-efficiency cellular model of fibrillar alpha-synuclein inclusions and the examination of mutations that inhibit amyloid formation. *J Neurochem* 113(2):374–388.
- Waxman EA, Giasson BI (2008) Specificity and regulation of casein kinase-mediated phosphorylation of alpha-synuclein. *J Neuropathol Exp Neurol* 67(5):402–416.
- Waxman EA, Duda JE, Giasson BI (2008) Characterization of antibodies that selectively detect alpha-synuclein in pathological inclusions. *Acta Neuropathol* 116(1):37–46.
- Kuusisto E, Parkkinen L, Alafuzoff I (2003) Morphogenesis of Lewy bodies: dissimilar incorporation of alpha-synuclein, ubiquitin, and p62. *J Neuropathol Exp Neurol* 62(12):1241–1253.









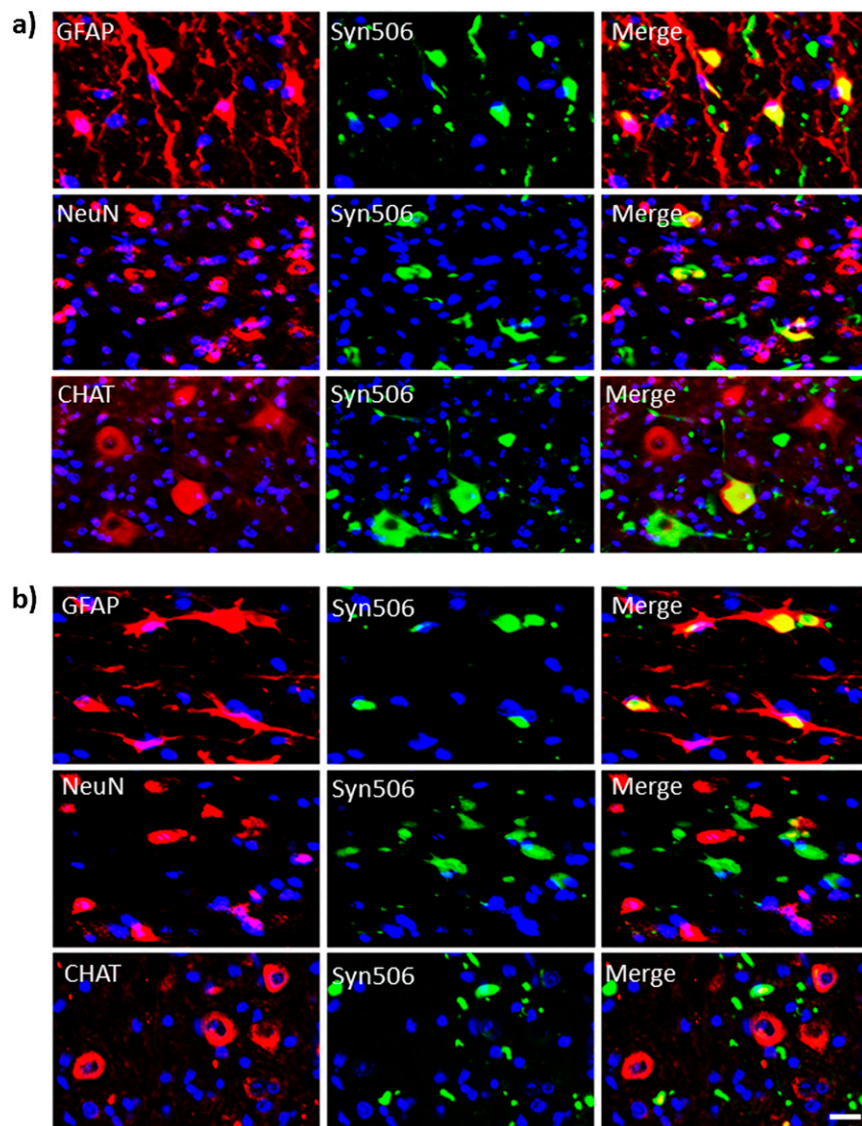

**Fig. S5.**  $\alpha$ S inclusion pathology is found in multiple cell types postinjection of fib  $\alpha$ S in both M83<sup>+/+</sup> and M20<sup>+/-</sup> Tg mice. Double immunofluorescence analysis of cervical spinal cord tissue from an M83<sup>+/+</sup> Tg mouse that is 2 mo postinjection (A) and an M20<sup>+/-</sup> Tg mouse that is 12 mo postinjection (B) of 10  $\mu$ g of hfib21-140  $\alpha$ S. In M83<sup>+/+</sup> Tg mice, Syn506+  $\alpha$ S inclusions were found in both astrocytes (GFAP) and neurons (NeuN), particularly in motor neurons in the ventral horn of the spinal cord (CHAT). In M20<sup>+/-</sup> Tg mice, Syn506+  $\alpha$ S inclusions were frequently found in astrocytes and to a lesser extent in neurons; however, rarely were any  $\alpha$ S inclusions found in motor neurons. Tissue sections were counterstained with DAPI (blue). (Scale bar: 50  $\mu$ m.)

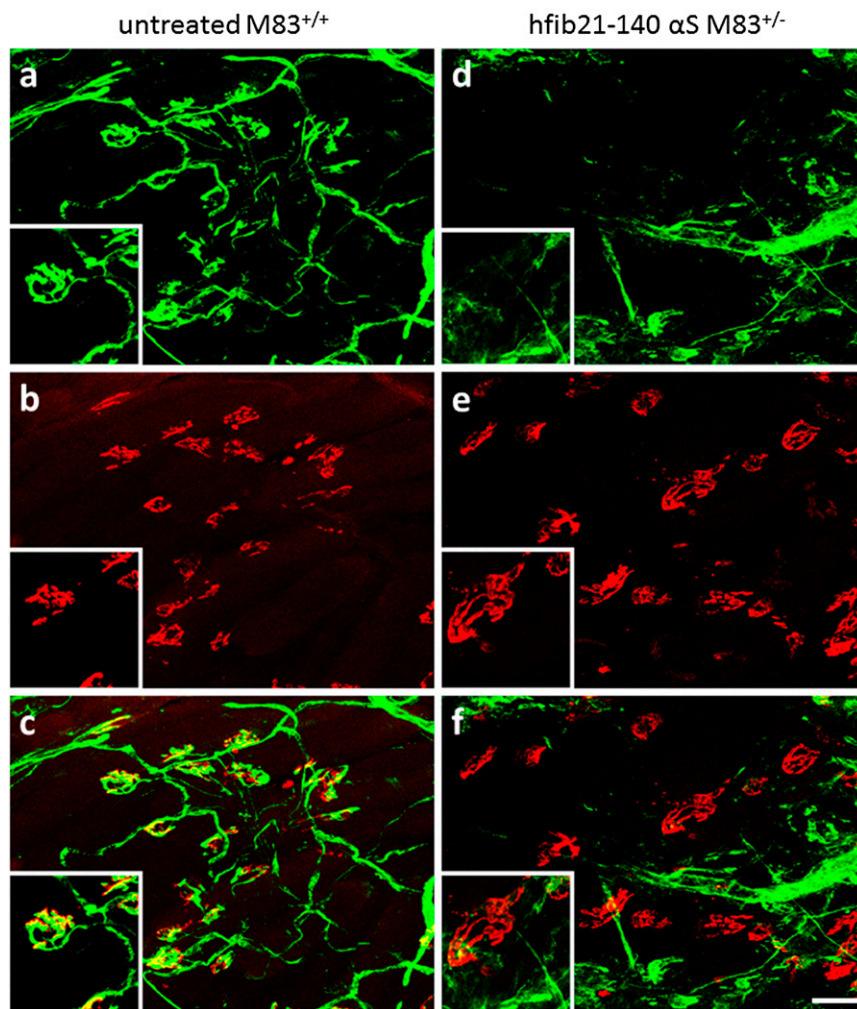

**Fig. 56.** Loss of intact NMJ in M83<sup>+/-</sup> Tg mice after injection of 10 μg of hfib21-140 αS. Double-immunofluorescence analysis of the digitorum brevis muscles of untreated M83<sup>+/+</sup> Tg mice and injected M83<sup>+/-</sup> Tg mice was used to detect the presynaptic motor neuron axon (neurofilament H and syntaptotagmin; green; *A* and *D*) and the postsynaptic acetylcholine receptor (α-bungarotoxin; red; *B* and *E*) of the NMJ. In the native M83<sup>+/+</sup> Tg mice, the NMJs were fully innervated as shown by colocalization of motor neuron axonal markers with postsynaptic receptors (*C*). However, in the M83<sup>+/-</sup> Tg mice IM injected with hfib21-140 αS and exhibiting a progressive, degenerative motor phenotype, there was dramatic withdrawal of motor neuron axons from the postsynaptic sites (*F*). (Scale bar: *A–F*, 50 μm; *Insets*, 25 μm.)

**Table S1. Summary of M83 Tg mice injected with  $\alpha$ S proteins and LPS control**

| Strain                               | Inoculum                                                            | Muscle site of injection | No. of mice | Median survival, dpi    | Phenotype                                     | Pathology                                            |
|--------------------------------------|---------------------------------------------------------------------|--------------------------|-------------|-------------------------|-----------------------------------------------|------------------------------------------------------|
| M83 <sup>+/+</sup> (A53T $\alpha$ S) | Bilateral hfib21-140- $\alpha$ S (5 $\mu$ L of 2 mg/mL)             | Biceps femoris           | 15          | 77                      | 12 of 15 with foot drop/paralysis*            | 12 of 15 with robust $\alpha$ S pathology*           |
| M83 <sup>+/+</sup> (A53T $\alpha$ S) | Bilateral mfib- $\alpha$ S (5 $\mu$ L of 2 mg/mL)                   | Biceps femoris           | 7           | 53                      | 7 of 7 with foot drop/paralysis               | 7 of 7 with robust $\alpha$ S pathology              |
| M83 <sup>+/+</sup> (A53T $\alpha$ S) | Unilateral mfib- $\alpha$ S (5 $\mu$ L of 2 mg/mL)                  | Gastrocnemius            | 9           | 56                      | 8 of 9 with foot drop/paralysis <sup>†</sup>  | 8 of 9 with robust $\alpha$ S pathology <sup>†</sup> |
| M83 <sup>+/+</sup> (A53T $\alpha$ S) | Bilateral $\Delta$ 71-82 $\alpha$ S (5 $\mu$ L of 2 mg/mL)          | Biceps femoris           | 11          | 120                     | 2 of 11 with foot drop/paralysis <sup>‡</sup> | 5 of 11 with $\alpha$ S pathology <sup>§</sup>       |
| M83 <sup>+/+</sup> (A53T $\alpha$ S) | Bilateral LPS (5 $\mu$ L of 5 mg/mL)                                | Biceps femoris           | 5           | Harvested at 123 dpi    | 0 of 5 with foot drop/paralysis               | 0 of 5 with $\alpha$ S pathology                     |
| M83 <sup>+/-</sup> (A53T $\alpha$ S) | Bilateral hfib21-140- $\alpha$ S (5 $\mu$ L of 2 mg/mL)             | Gastrocnemius            | 10          | 111                     | 10 of 10 with foot drop/paralysis             | 10 of 10 with robust $\alpha$ S pathology            |
| M83 <sup>+/-</sup> (A53T $\alpha$ S) | Unilateral mfib- $\alpha$ S (5 $\mu$ L of 2 mg/mL)                  | Gastrocnemius            | 10          | 129                     | 10 of 10 with foot drop/paralysis             | 10 of 10 with robust $\alpha$ S pathology            |
| M83 <sup>+/-</sup> (A53T $\alpha$ S) | Unilateral mfib- $\alpha$ S (5 $\mu$ L of 2 mg/mL) SNT <sup>¶</sup> | Gastrocnemius            | 7           | Undefined <sup>  </sup> | 3 of 7 mice with foot drop/paralysis**        | 3 of 7 mice with robust $\alpha$ S pathology**       |

M83 Tg mice received injections at 2 mo of age. See Fig. 2 for pathology distribution.

\*Two mice died suddenly without an observed phenotype and were not available to analyze for  $\alpha$ S pathology.

<sup>†</sup>One mouse died suddenly without an observed phenotype and was not available to analyze for  $\alpha$ S pathology.

<sup>‡</sup>Two of these mice had a similar foot drop phenotype and extensive hind limb paralysis as mice injected with fib  $\alpha$ S, and an additional four mice were moribund with more subtle muscle weakness, but without obvious foot drop or paralysis. They were killed upon veterinary recommendation.

<sup>§</sup>Two of these mice had widespread  $\alpha$ S pathology as described in Fig. 2C. Three additional mice without a phenotype had  $\alpha$ S pathology in the same area, but less abundant.

<sup>¶</sup>SNT, sciatic nerve transection.

<sup>||</sup>Four mice in the cohort are still living with no sign of any degenerative phenotype.

\*\*See Fig. 3.

**Table S2. Summary of M20 Tg mice injected with  $\alpha$ S proteins and PBS control**

| Strain                             | Inoculum                                                   | Muscle site of injection | No. of mice | Harvest time point, dpi | Phenotype                       | Pathology                                                       |
|------------------------------------|------------------------------------------------------------|--------------------------|-------------|-------------------------|---------------------------------|-----------------------------------------------------------------|
| M20 <sup>+/-</sup> (WT $\alpha$ S) | Bilateral PBS (5 $\mu$ L)                                  | Biceps femoris           | 5           | 360                     | 0 of 5 with foot drop/paralysis | 0 of 5 with $\alpha$ S pathology                                |
| M20 <sup>+/-</sup> (WT $\alpha$ S) | Bilateral $\Delta$ 71-82 $\alpha$ S (5 $\mu$ L of 2 mg/mL) | Biceps femoris           | 5           | 360                     | 0 of 5 with foot drop/paralysis | 1 of 5 with rare $\alpha$ S inclusions in spinal cord*          |
| M20 <sup>+/-</sup> (WT $\alpha$ S) | Bilateral hfib21-140- $\alpha$ S (5 $\mu$ L of 2 mg/mL)    | Biceps femoris           | 7           | 120                     | 0 of 7 with foot drop/paralysis | 1 of 7 with sparse $\alpha$ S inclusions in spinal cord*        |
| M20 <sup>+/-</sup> (WT $\alpha$ S) | Bilateral hfib21-140- $\alpha$ S (5 $\mu$ L of 2 mg/mL)    | Biceps femoris           | 5           | 240                     | 0 of 5 with foot drop/paralysis | 5 of 5 with moderate spinal cord and brain $\alpha$ S pathology |
| M20 <sup>+/-</sup> (WT $\alpha$ S) | Bilateral hfib21-140- $\alpha$ S (5 $\mu$ L of 2 mg/mL)    | Biceps femoris           | 5           | 360                     | 0 of 5 with foot drop/paralysis | 5 of 5 with moderate spinal cord and brain $\alpha$ S pathology |

M20 Tg mice received injections at 2 mo of age. See Fig. 4 for pathology distribution.

\*These inclusions in spinal cord were detected with  $\alpha$ S antibodies but not antibodies to the general inclusion marker p62 (Fig. 4 and Fig. S1).

**Table S3. Summary of IM-injected nTg and SNCA<sup>-/-</sup> mice**

| Strain              | Inoculum                                          | Muscle site of injection | No. of mice | Harvest time point, dpi | Phenotype                       | Pathology                        |
|---------------------|---------------------------------------------------|--------------------------|-------------|-------------------------|---------------------------------|----------------------------------|
| nTg                 | Bilateral hfib- $\alpha$ S (5 $\mu$ L of 2 mg/mL) | Biceps femoris           | 5           | 360                     | 0 of 5 with foot drop/paralysis | 0 of 5 with $\alpha$ S pathology |
| nTg                 | Bilateral mfib- $\alpha$ S (5 $\mu$ L of 2 mg/mL) | Biceps femoris           | 5           | 360                     | 0 of 5 with foot drop/paralysis | 0 of 5 with $\alpha$ S pathology |
| SNCA <sup>-/-</sup> | Bilateral hfib- $\alpha$ S (5 $\mu$ L of 2 mg/mL) | Biceps femoris           | 7           | 360                     | 0 of 5 with foot drop/paralysis | 0 of 5 with $\alpha$ S pathology |

nTg and SNCA<sup>-/-</sup> mice received injections at 2 mo of age.



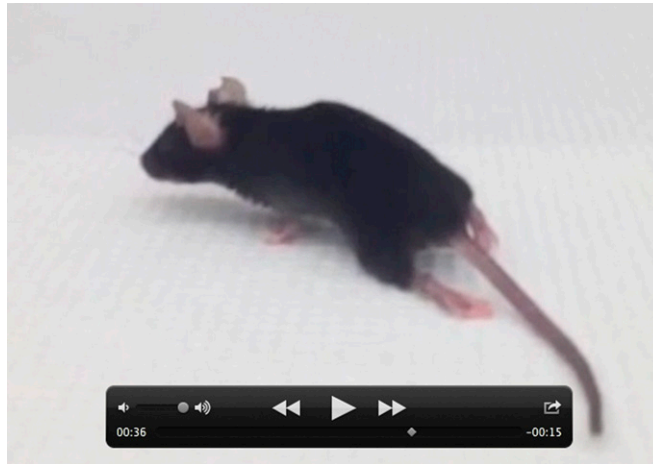

**Movie S1.** Bilateral hind limb foot drop and hind leg weakness in an M83<sup>+/+</sup> Tg mouse at 2 mo post IM injection of hfib21-140  $\alpha$ S. The foot drop progressed to paralysis and a moribund state within a week.

[Movie S1](#)
